# Supplementary material for: Removal of Arsenic Oxyanions from Water by Ferric Chloride—Optimization of Process Conditions and Implications for Improving Coagulation Performance
Source: MDPI journal article supplement (doi:10.3390/ijerph18189812), 2021-09-17
Supplement: s1 [file s1]

*Supplementary Information*

# **Removal of Arsenic Oxyanions from Water by Ferric Chloride—Optimization of Process Conditions and Implications for Improving Coagulation Performance**

**Muhammad Ali Inam <sup>1</sup>, Rizwan Khan <sup>2</sup>, Kang Hoon-Lee <sup>3,\*</sup> and Young Min-Wie <sup>4</sup>**

<sup>1</sup> Institute of Environmental Sciences and Engineering (IESE), School of Civil and Environmental Engineering (SCEE), National University of Sciences and Technology (NUST) H-12 Campus, Islamabad 44000, Pakistan; ainam@iese.nust.edu.pk

<sup>2</sup> Department of Chemical Engineering, Quaid-e-Awam University of Engineering, Science and Technology (QUEST), Nawabshah, Sindh 67480, Pakistan; rizwansoomro@quest.edu.pk

<sup>3</sup> Department of Civil and Environmental Engineering, Hanyang University, 222 Seongdong-gu, Seoul 04763, Korea

<sup>4</sup> Department of Materials Engineering, Kyonggi University, Suwon, 162-27, Korea  
supreme98@kyonggi.ac.kr

\* Correspondence: diasyoung@hanyang.ac.kr

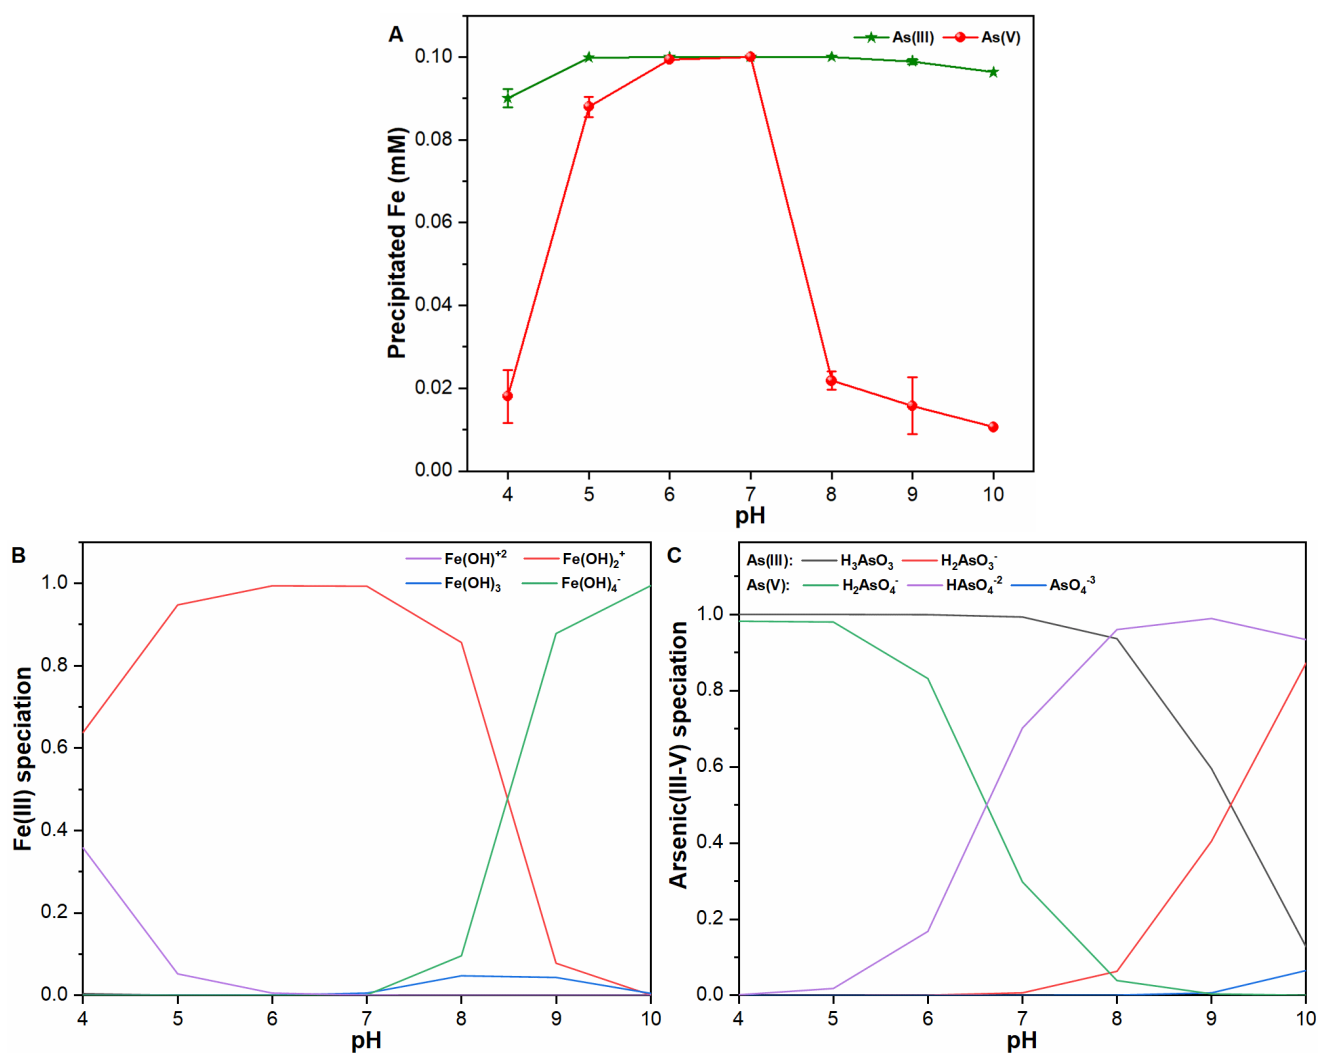

**Figure S1.** (A) FHO formation in the presence of 1000 µg/L As (III–V) species, pH range of 4–10, temperature (25 °C) and FC dosage of 0.1 m.mol/L; (B,C) Speciation diagrams of Fe (III), As (III) and As (V) species using chemical modelling software Visual MINTEQ.

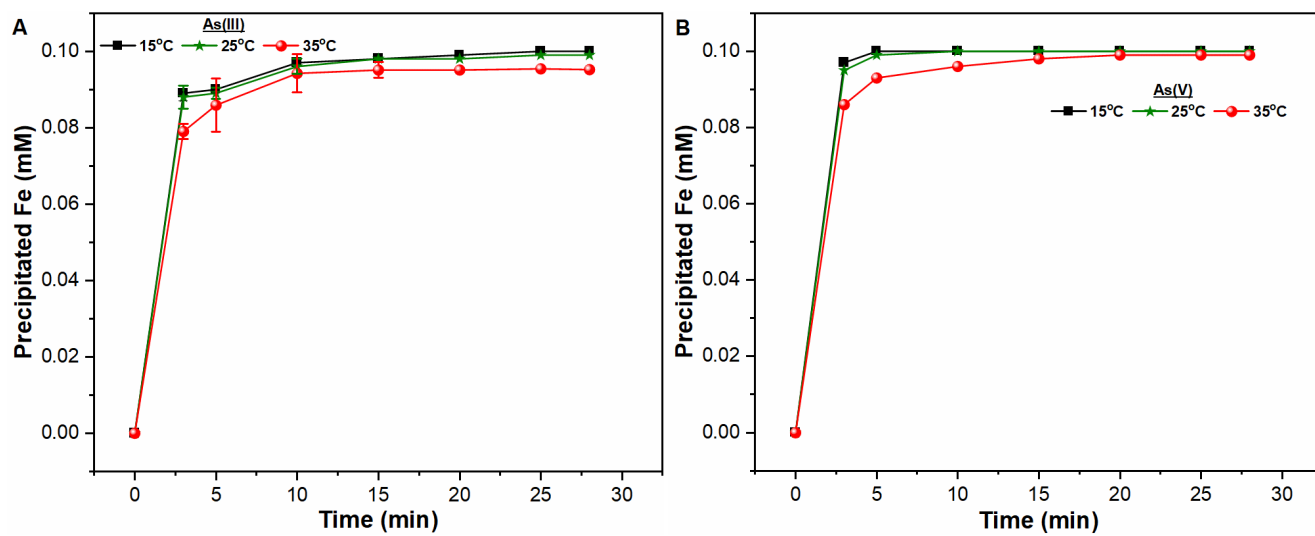

**Figure S2.** FHO formation in the presence of 1000 µg/L (A) As (III) and (B) As (V) species, neutral pH, 0.1 m.mol/L FC dosage and various temperature (15–35°C) and contact time (0–28 min).

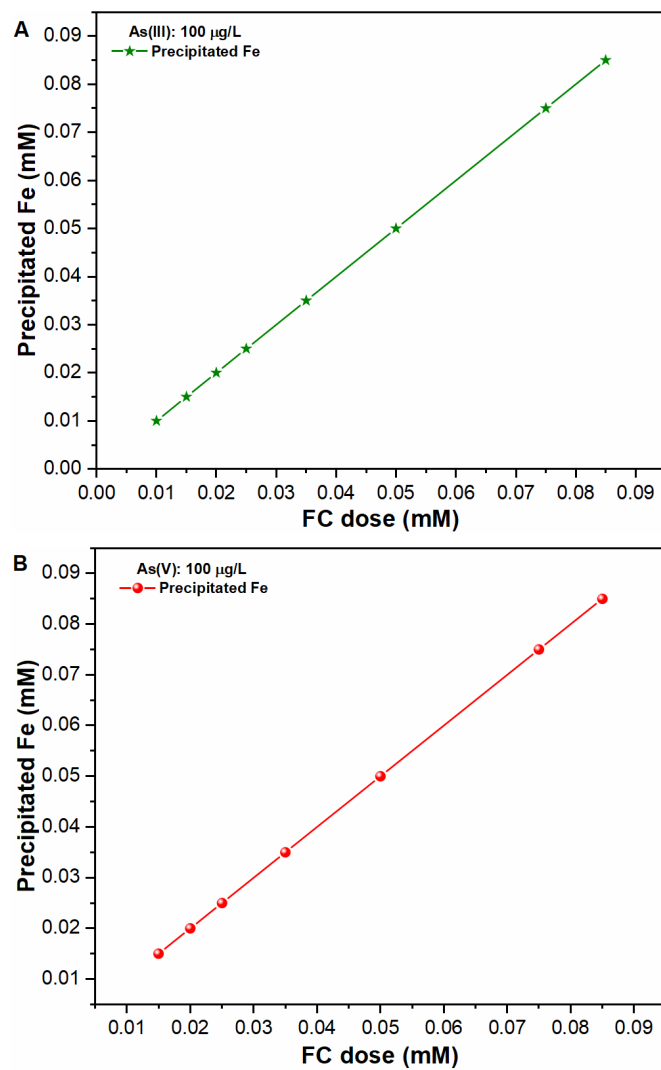

**Figure S3.** FHO formation in the presence of 100 µg/L (A) As (III); and (B) As (V) species at optimum pH and temperature under various FC dosages in water.

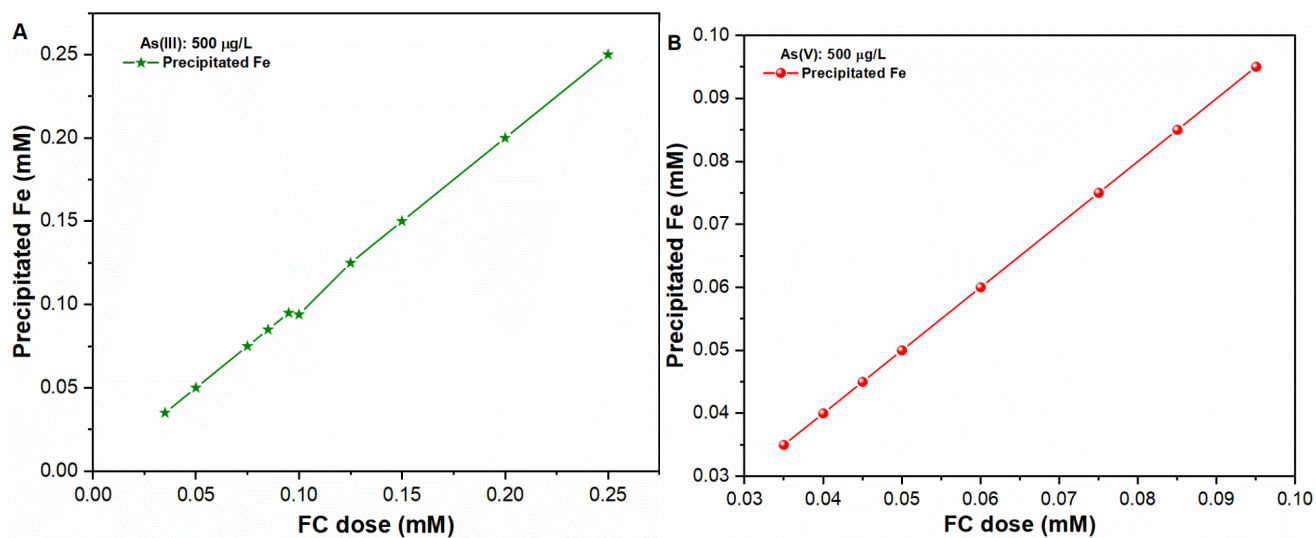

**Figure S4.** FHO formation in the presence of 500 µg/L (A) As (III); and (B) As (V) species at optimum pH and temperature under various FC dosages in water.

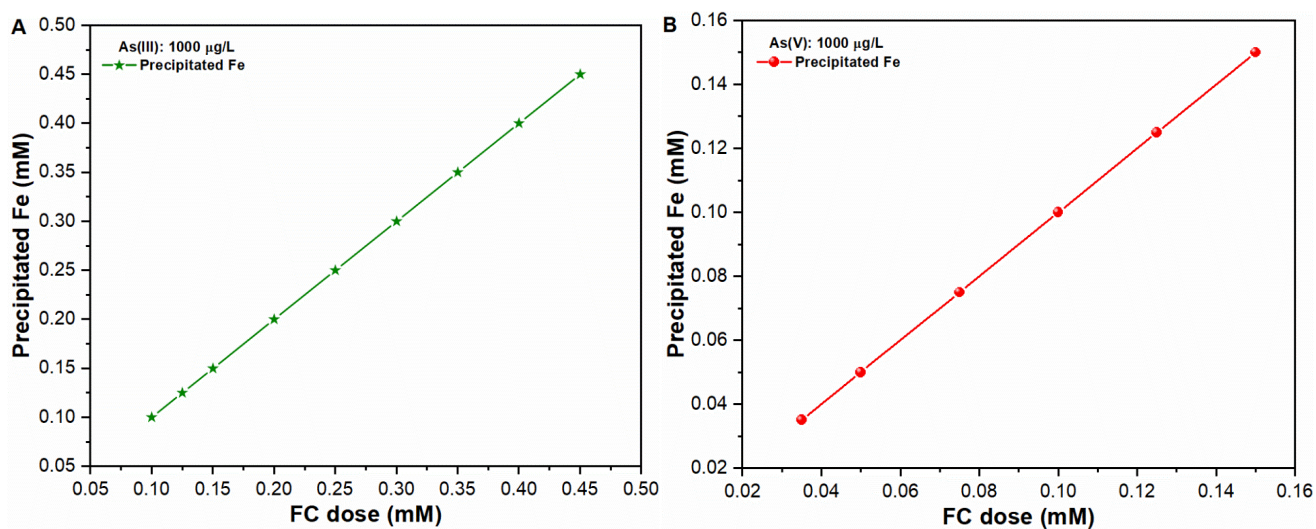

**Figure S5.** FHO formation in the presence of 1000 µg/L (A) As (III); and (B) As (V) species at optimum pH and temperature under various FC dosages in water.
